# Supplementary material
Source: PubMed Central journal article supplement (PMC6535778)

## Supporting Information

### A New Magnetic Topological Quantum Material Candidate by Design

*Xin Gui,<sup>a</sup> Ivo Pletikovic,<sup>bc</sup> Huibo Cao,<sup>d</sup> Hung-Ju Tien,<sup>e</sup> Xitong Xu,<sup>f</sup> Ruidan Zhong,<sup>b</sup> Guangqiang Wang,<sup>f</sup> Tay-Rong Chang,<sup>e</sup> Shuang Jia,<sup>fgh</sup> Tonica Valla,<sup>c</sup> Weiwei Xie<sup>a\*</sup> and Robert J. Cava<sup>b\*</sup>*

<sup>a</sup> Department of Chemistry, Louisiana State University, Baton Rouge, LA 70803

<sup>b</sup> Department of Chemistry, Princeton University, Princeton, NJ 08540

<sup>c</sup> Condensed Matter Physics and Materials Science, Brookhaven National Laboratory, Upton, NY, 11973

<sup>d</sup> Neutron Scattering Division, Oak Ridge National Laboratory, Oak Ridge, TN 37831

<sup>e</sup> Department of Physics, National Cheng Kung University, Tainan, Taiwan, 70101

<sup>f</sup> International Center for Quantum Materials, School of Physics, Peking University, Beijing, People's Republic of China 100871

<sup>g</sup> Collaborative Innovation Center of Quantum Matter, Beijing, People's Republic of China 100871

<sup>h</sup> CAS Center for Excellence in Topological Quantum Computation, University of Chinese Academy of Sciences, Beijing, People's Republic of China 100190

### Table of Contents

|                        |   |
|------------------------|---|
| <u>Figure S1</u> ..... | 2 |
| <u>Figure S2</u> ..... | 3 |

**Fig. S1. (A)** The field-dependence of  $\rho_{xx}$  for various temperatures (2 K, 5 K, 10 K, 15 K, 25 K, 40 K & 70 K) on sweeping applied field from 9 T to -9 T for sample #2. **(B)** The magnetoresistance at the above temperatures normalized to the values at 0 applied magnetic field for sample #2.

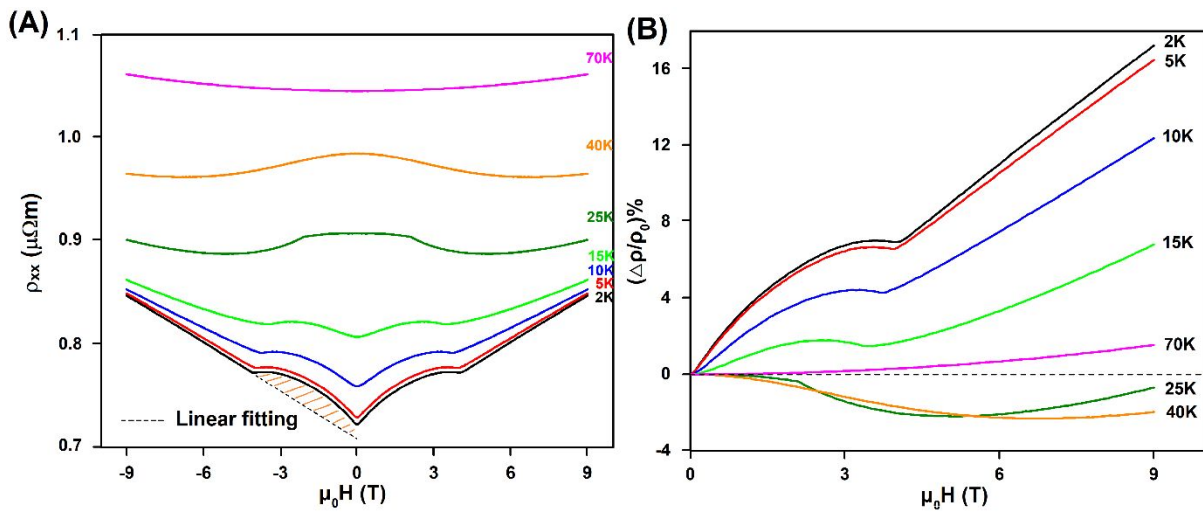

**Fig. S2.** The first Brillouin zone of the rhombohedral lattice with the high symmetry momentum points marked ( $\Gamma$ -M-K).

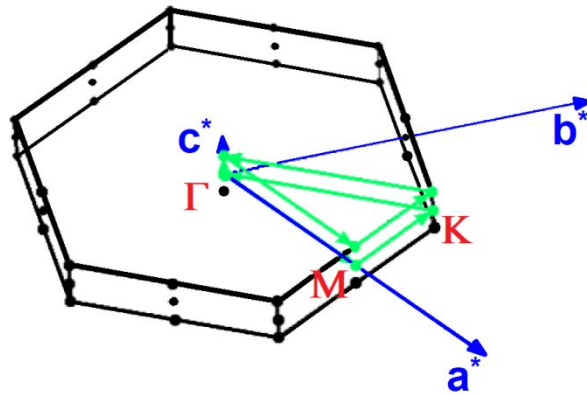

Supplement: oc9b00202_si_001.pdf [file oc9b00202_si_001.pdf]
